# Supplementary material
Source: PubMed Central journal article supplement (PMC2919837)

## Legends for Supplemental Tables and Figure

**Table S1.** ANOVA of whole-brain data that compared  $\beta$ -values associated with hits, misses and correct rejections (voxel-wise threshold,  $p < 0.001$ ). Analysis of regions with significant main effects identified a set of regions where activity was increased in association with hits (targets endorsed as old) relative to misses (targets endorsed as new) or correct rejections (CR). The anatomical region (L, left; R, right), applicable Brodmann Map area, and MNI coordinates of the peak voxel are listed for each cluster ( $p$ -corrected  $< 0.05$ ).

**Figure S1.** Stimulus-selective regions in the visual association cortex were identified using functional localizer blocks completed in the MRI scanner. The results from a group analysis (paired t-tests, voxel-wise threshold  $p < 0.001$ ; cluster-extent,  $p$ -corrected  $< 0.05$ ) are overlaid on an image of the MNI template brain. Axial views show regions associated with **(A)** object-selective ( $y = 0$ ) and **(B)** scene-selective ( $y = -14$ ) increases in activity for the respective contrasts.

**Table S1**

| Brain region                   | BA    | x   | y   | z   |
|--------------------------------|-------|-----|-----|-----|
| <i>Hits &gt; Misses and CR</i> |       |     |     |     |
| L inferior frontal sulcus      | 10    | -26 | 58  | 6   |
| L inferior frontal gyrus       | 10/46 | -40 | 48  | 8   |
| R middle frontal gyrus         | 9/46  | 44  | 40  | 20  |
| L cingulate sulcus             | 32    | -6  | 42  | 2   |
| L medial orbital gyrus         | 11    | -20 | 44  | -16 |
| L middle frontal gyrus         | 9/46  | -48 | 32  | 28  |
| L superior frontal sulcus      | 6     | -24 | 10  | 54  |
| R middle frontal gyrus         | 6     | 32  | 10  | 56  |
| L putamen                      |       | -10 | 8   | -8  |
| R collateral sulcus            | 35    | 34  | -14 | -26 |
| L hippocampus                  |       | -32 | -18 | -14 |
| L hippocampus                  |       | -24 | -30 | -10 |
| R cingulate gyrus              | 23    | 4   | -34 | 28  |
| L parahippocampal gyrus        | 35    | -24 | -28 | -26 |
| L parahippocampal gyrus        | 35/36 | -30 | -38 | -18 |
| R inferior parietal sulcus     | 39    | 38  | -48 | 46  |
| L inferior parietal sulcus     | 39    | -36 | -52 | 48  |
| R superior parietal gyrus      | 7     | 10  | -66 | 54  |
| L superior parietal gyrus      | 7     | -6  | -70 | 48  |
| R inferior temporal gyrus      | 19    | 54  | -56 | -14 |
| L inferior temporal gyrus      | 19    | -52 | -58 | -12 |

**Figure S1**

**A** Object-selective localizer:  
objects > scrambled objects

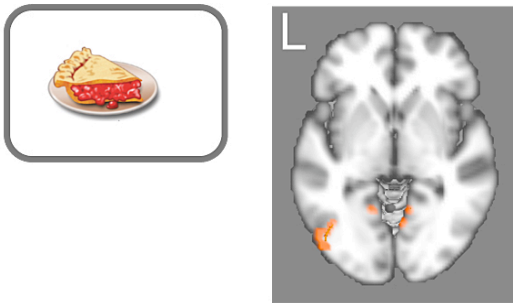

**B** Scene-selective localizer:  
scenes > objects

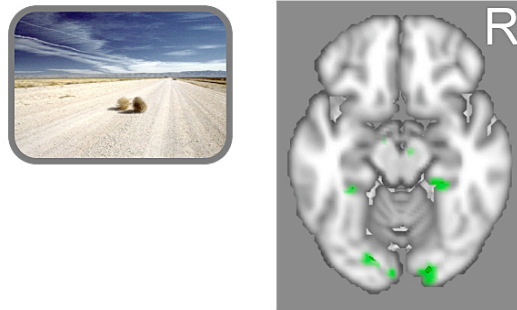

Supplement: NIHMS216049-supplement-Supp1.pdf [file NIHMS216049-supplement-Supp1.pdf]
